# Supplementary material
Source: publisher figshare collection journal article supplement (https://geolsoc.figshare.com/ndownloader/files/5424311)
Supplement: Supplementary file 1 [file 5424311]

	SAMPLE	Eg1a cpx1	Eg1a cpx2	Eg1a cpx3	Eg1a cpx4	Eg1a cpx5	Eg1a cpx6	Eg1a cpx7	Eg1a micro1	Eg1a micro2	Eg1a micro3	Eg1a micro4	Eg1a micro5	Eg1a micro6		Smg14 cpx1	Smg14 cpx2	Smg14 cpx3	Smg14 cpx4	Smg14 cpx5	Smg14 cpx6	Smg14 cpx7	Smg14 cpx9	Smg14 micro2	Smg14 micro3	Smg14 micro4	Smg14 micro5		Smg3a cpx1	Smg3a cpx2	Smg3a cpx3	Smg3a cpx4	Smg3a cpx5	Smg3a cpx6	Smg3a cpx7	Smg3a micro1	Smg3a micro2	Smg3a micro3	Smg3a micro4	Smg3a micro5		Smg3b cpx1	Smg3b cpx2	Smg3b cpx3	Smg3b cpx4	Smg3b cpx5	Smg3b micro1	Smg3b micro2	Smg3b micro3
	volcanic complex	RPFZ_S-I	RPFZ_S-I	RPFZ_S-I	RPFZ_S-I	RPFZ_S-I	RPFZ_S-I	RPFZ_S-I	RPFZ_S-I	RPFZ_S-I	RPFZ_S-I	RPFZ_S-I	RPFZ_S-I	RPFZ_S-I		RPFZ_S-I	RPFZ_S-I	RPFZ_S-I	RPFZ_S-I	RPFZ_S-I	RPFZ_S-I	RPFZ_S-I	RPFZ_S-I	RPFZ_S-I	RPFZ_S-I	RPFZ_S-I	RPFZ_S-I		RPFZ_S-II	RPFZ_S-II	RPFZ_S-II	RPFZ_S-II	RPFZ_S-II	RPFZ_S-II	RPFZ_S-II	RPFZ_S-II	RPFZ_S-II	RPFZ_S-II	RPFZ_S-II	RPFZ_S-II		RPFZ_S-II	RPFZ_S-II	RPFZ_S-II	RPFZ_S-II	RPFZ_S-II	RPFZ_S-II	RPFZ_S-II	RPFZ_S-II
CLINOPYROXENES	SiO2	51.77	49.34	47.47	52.81	52.59	52.63	52.18	47.11	48.49	51.53	44.65	49.95	49.46		51.77	51.02	47.60	51.27	51.25	50.96	51.42	52.34	52.12	51.60	51.62	51.58		47.16	47.22	46.56	48.06	45.67	46.77	46.55	46.97	47.18	47.16	47.66	46.76		46.96	47.83	52.89	47.80	48.19	49.52	45.51	48.67
	TiO2	0.65	1.15	1.67	0.54	0.69	0.55	0.62	2.75	1.54	1.17	3.40	1.45	1.52		0.78	0.92	2.25	0.94	1.06	0.94	0.92	0.79	0.98	0.86	1.00	0.81		2.13	2.23	2.63	1.92	2.88	2.40	2.49	2.18	2.14	2.20	2.07	2.15		2.28	2.02	0.32	2.05	2.06	1.65	2.73	1.75
	Al2O3	3.18	4.51	5.94	2.56	3.29	3.04	3.28	7.20	6.99	2.81	9.92	4.67	4.77		2.72	3.04	6.78	3.65	3.51	3.15	3.34	2.59	3.00	2.95	3.00	2.52		6.90	7.25	7.80	6.16	8.28	7.21	7.49	6.85	6.93	6.98	6.49	7.51		7.21	6.45	1.16	6.43	6.07	4.32	7.57	5.35
	Cr2O3	0.33	0.20	0.12	0.81	0.20	1.22	0.44	0.20	0.13	0.42	0.06	0.33	1.02		0.54	0.73	0.23	0.86	0.41	0.39	0.95	0.78	0.36	0.31	0.82	0.65		-	0.03	0.11	-	-	0.02	0.04	-	-	0.04	-	0.01			0.03	0.03	0.02		0.40		0.36
	FeO	4.76	6.22	6.98	4.35	4.29	3.76	4.86	6.61	5.95	5.34	6.78	5.10	5.34		4.17	4.31	6.73	4.39	4.70	4.29	4.13	3.81	4.35	4.20	4.37	3.98		8.05	8.06	7.84	7.97	8.19	8.54	7.97	8.22	8.20	8.06	8.10	8.16		8.03	7.88	7.00	7.78	7.90	6.53	8.10	7.21
	MnO	0.16	0.12	0.17	0.07	0.15	0.10	0.15	0.13	0.16	0.12	0.06	0.08	0.10		0.06	0.09	0.11	0.10	0.09	0.08	0.05	0.09	0.05	0.13	0.09	0.07		0.18	0.19	0.08	0.16	0.14	0.20	0.16	0.19	0.20	0.21	0.20	0.11		0.15	0.19	0.25	0.21	0.12	0.09	0.11	0.16
	MgO	16.90	14.84	13.44	18.02	16.88	17.04	17.30	13.35	14.33	15.87	12.20	15.14	14.76		16.74	16.55	13.85	16.21	16.08	16.56	16.46	17.02	16.73	17.01	16.53	16.85		13.01	12.94	12.68	13.16	12.56	12.43	12.88	12.76	12.79	13.16	12.88	12.86		13.07	12.98	14.41	13.16	13.75	14.84	12.73	14.39
	CaO	20.36	21.06	21.31	19.85	21.62	20.43	19.98	21.73	20.59	21.50	21.41	22.25	21.84		22.31	22.10	21.76	22.15	22.12	22.23	22.17	22.06	22.27	22.30	22.03	22.42		20.84	20.73	20.90	21.12	21.10	21.02	20.70	21.22	20.78	20.75	21.04	20.74		20.94	21.13	23.09	20.70	20.50	20.89	21.06	20.38
	Na2O	0.39	0.52	0.64	0.41	0.30	0.48	0.46	0.39	0.66	0.31	0.69	0.23	0.29		0.26	0.29	0.40	0.29	0.28	0.23	0.33	0.35	0.24	0.28	0.29	0.28		0.64	0.66	0.56	0.65	0.54	0.65	0.65	0.64	0.66	0.64	0.68	0.60		0.67	0.61	0.44	0.58	0.57	0.44	0.54	0.51
	K2O	0.01	-	-	0.02	-	0.01	-	-	-	-	0.02	-	-		-	-	-	-	-	-	-	-	-	-	-	-		-	-	-	-	-	-	-	-	-	-	-	-		-	-	-	-	-	-	-	-
	tot	98.51	97.97	97.74	99.43	100.02	99.27	99.27	99.46	98.84	99.06	99.19	99.19	99.10		99.34	99.05	99.71	99.87	99.50	98.83	99.78	99.83	100.09	99.64	99.76	99.17		98.91	99.32	99.17	99.20	99.36	99.23	98.93	99.03	98.88	99.19	99.12	98.90		99.30	99.12	99.59	98.73	99.16	98.68	98.34	98.78
	Si	1.915	1.850	1.793	1.929	1.916	1.930	1.912	1.755	1.799	1.910	1.667	1.850	1.840		1.902	1.882	1.764	1.878	1.885	1.883	1.883	1.911	1.902	1.887	1.893	1.897		1.767	1.763	1.743	1.796	1.708	1.753	1.745	1.761	1.770	1.762	1.784	1.753		1.752	1.790	1.965	1.795	1.799	1.850	1.719	1.819
	Ti	0.018	0.033	0.047	0.015	0.019	0.015	0.017	0.077	0.043	0.033	0.095	0.040	0.042		0.022	0.026	0.063	0.026	0.029	0.026	0.025	0.022	0.027	0.024	0.027	0.022		0.060	0.063	0.074	0.054	0.081	0.068	0.070	0.061	0.060	0.062	0.058	0.061		0.064	0.057	0.009	0.058	0.058	0.046	0.078	0.049
	Cr	0.010	0.006	0.004	0.023	0.006	0.035	0.013	0.006	0.004	0.012	0.002	0.010	0.030		0.016	0.021	0.007	0.025	0.012	0.011	0.028	0.022	0.010	0.009	0.024	0.019		0.000	0.001	0.003	0.000	0.000	0.000	0.001	0.000	0.000	0.001	0.000	0.000		0.000	0.001	0.001	0.001	0.000	0.012	0.000	0.011
	Al	0.139	0.199	0.264	0.110	0.141	0.131	0.142	0.316	0.306	0.123	0.437	0.204	0.209		0.118	0.132	0.296	0.158	0.152	0.137	0.144	0.111	0.129	0.127	0.130	0.109		0.305	0.319	0.344	0.271	0.365	0.319	0.331	0.303	0.307	0.307	0.286	0.332		0.317	0.285	0.051	0.285	0.267	0.190	0.337	0.236
	AlIV	0.085	0.150	0.207	0.071	0.084	0.070	0.088	0.245	0.201	0.090	0.333	0.150	0.160		0.098	0.118	0.236	0.122	0.115	0.117	0.117	0.089	0.098	0.113	0.107	0.103		0.233	0.237	0.257	0.204	0.292	0.247	0.255	0.239	0.230	0.238	0.216	0.247		0.248	0.210	0.035	0.205	0.201	0.150	0.281	0.181
	AlVI	0.053	0.049	0.057	0.039	0.058	0.062	0.054	0.071	0.105	0.033	0.103	0.054	0.049		0.020	0.014	0.061	0.036	0.037	0.020	0.027	0.023	0.031	0.014	0.022	0.006		0.072	0.082	0.088	0.067	0.073	0.072	0.076	0.063	0.077	0.069	0.070	0.085		0.069	0.074	0.016	0.079	0.066	0.040	0.055	0.055
	Fe+3	0.015	0.068	0.099	0.009	0.003	0.000	0.019	0.043	0.054	0.001	0.088	0.021	0.018		0.038	0.053	0.072	0.029	0.028	0.050	0.035	0.025	0.019	0.063	0.027	0.052		0.087	0.078	0.059	0.077	0.095	0.086	0.085	0.100	0.080	0.090	0.079	0.084		0.099	0.065	0.033	0.052	0.061	0.037	0.110	0.053
	Fe+2	0.133	0.127	0.122	0.124	0.127	0.115	0.130	0.163	0.131	0.165	0.124	0.137	0.149		0.091	0.080	0.137	0.105	0.116	0.082	0.092	0.091	0.113	0.066	0.107	0.070		0.165	0.174	0.187	0.172	0.161	0.182	0.165	0.158	0.177	0.161	0.174	0.172		0.151	0.181	0.185	0.192	0.186	0.167	0.146	0.172
	Mn	0.005	0.004	0.006	0.002	0.005	0.003	0.005	0.004	0.005	0.004	0.002	0.003	0.003		0.002	0.003	0.003	0.003	0.003	0.003	0.002	0.003	0.002	0.004	0.003	0.002		0.006	0.006	0.003	0.005	0.005	0.006	0.005	0.006	0.006	0.007	0.006	0.004		0.005	0.006	0.008	0.007	0.004	0.003	0.003	0.005
	Ni	0.000	0.000	0.000	0.000	0.000	0.000	0.000	0.000	0.000	0.000	0.000	0.000	0.000															0.000	0.000	0.000	0.000	0.000	0.000	0.000	0.000	0.000	0.000	0.000	0.000		0.000	0.000	0.000	0.000	0.000	0.000	0.000	0.000
	Mg	0.932	0.829	0.757	0.981	0.917	0.932	0.945	0.741	0.793	0.877	0.679	0.836	0.818		0.917	0.910	0.765	0.885	0.882	0.912	0.898	0.926	0.910	0.927	0.903	0.924		0.727	0.720	0.708	0.733	0.700	0.695	0.720	0.713	0.715	0.733	0.719	0.719		0.727	0.724	0.798	0.736	0.765	0.826	0.716	0.802
	Ca	0.807	0.846	0.862	0.777	0.844	0.803	0.785	0.867	0.819	0.854	0.856	0.883	0.870		0.878	0.873	0.864	0.869	0.872	0.880	0.870	0.863	0.871	0.874	0.865	0.883		0.837	0.829	0.838	0.845	0.846	0.844	0.831	0.852	0.835	0.830	0.844	0.833		0.837	0.847	0.919	0.833	0.820	0.836	0.852	0.816
	Na	0.028	0.038	0.047	0.029	0.021	0.034	0.033	0.028	0.048	0.022	0.050	0.016	0.021		0.018	0.021	0.029	0.021	0.020	0.016	0.023	0.025	0.017	0.020	0.021	0.020		0.047	0.048	0.041	0.047	0.039	0.047	0.047	0.047	0.048	0.046	0.050	0.043		0.048	0.044	0.032	0.042	0.041	0.032	0.039	0.037
	K	0.001	0.000	0.000	0.001	0.000	0.001	0.000	0.000	0.000	0.000	0.001	0.000	0.000						0.001									0.000	0.000	0.000	0.000	0.000	0.000	0.000	0.000	0.000	0.000	0.000	0.000		0.000	0.000	0.000	0.000	0.000	0.000	0.000	0.000
	xMg(Fe2+)	0.875	0.867	0.862	0.888	0.878	0.890	0.879	0.820	0.858	0.842	0.846	0.859	0.846		0.910	0.919	0.848	0.894	0.884	0.917	0.907	0.911	0.889	0.934	0.894	0.930		0.815	0.805	0.791	0.810	0.813	0.793	0.813	0.819	0.801	0.820	0.805	0.807		0.828	0.800	0.812	0.793	0.804	0.832	0.831	0.823
	jad	0.028	0.038	0.047	0.030	0.021	0.035	0.033	0.028	0.048	0.022	0.051	0.016	0.021		0.018	0.014	0.029	0.021	0.021	0.016	0.023	0.023	0.017	0.014	0.021	0.006		0.047	0.048	0.041	0.047	0.039	0.047	0.047	0.047	0.048	0.046	0.050	0.043		0.048	0.044	0.016	0.042	0.041	0.032	0.039	0.037
	CaTiAl2O6	0.018	0.033	0.047	0.015	0.019	0.015	0.017	0.077	0.043	0.033	0.095	0.040	0.042		0.022	0.026	0.063	0.026	0.029	0.026	0.025	0.022	0.027	0.024	0.027	0.022		0.060	0.063	0.074	0.054	0.081	0.068	0.070	0.061	0.060	0.062	0.058	0.061		0.064	0.057	0.009	0.058	0.058	0.046	0.078	0.049
	CaCrAlSiO6	0.010	0.006	0.004	0.023	0.006	0.035	0.013	0.006	0.004	0.012	0.002	0.010	0.030		0.016	0.021	0.007	0.025	0.012	0.011	0.028	0.022	0.010	0.009	0.024	0.019		0.000	0.001	0.003	0.000	0.000	0.000	0.001	0.000	0.000	0.001	0.000	0.000		0.000	0.001	0.001	0.001	0.000	0.012	0.000	0.011
	CaFeAlSiO6	0.015	0.068	0.099	0.009	0.003	0.000	0.019	0.043	0.054	0.001	0.088	0.021	0.018		0.038	0.046	0.072	0.029	0.028	0.050	0.035	0.023	0.019	0.057	0.027	0.039		0.087	0.078	0.059	0.077	0.095	0.086	0.085	0.100	0.080	0.090	0.079	0.084		0.099	0.065	0.017	0.052	0.061	0.037	0.110	0.053
	CaTs	0.025	0.011	0.010	0.009	0.036	0.004	0.021	0.043	0.057	0.011	0.053	0.038	0.028		0.002	0.000	0.032	0.015	0.016	0.003	0.004	0.000	0.015	0.000	0.002	0.000		0.026	0.034	0.047	0.020	0.034	0.025	0.029	0.017	0.029	0.023	0.020	0.041		0.021	0.030	0.000	0.037	0.025	0.008	0.016	0.018
	enst	0.466	0.415	0.378	0.491	0.458	0.466	0.473	0.371	0.396	0.438	0.339	0.418	0.409		0.458	0.455	0.383	0.443	0.441	0.456	0.449	0.463	0.455	0.464	0.452	0.462		0.363	0.360	0.354	0.366	0.350	0.347	0.360	0.356	0.358	0.366	0.359	0.359		0.363	0.362	0.399	0.368	0.383	0.413	0.358	0.401
	fs	0.066	0.064	0.061	0.062	0.064	0.058	0.065	0.082	0.065	0.082	0.062	0.068	0.074		0.045	0.040	0.068	0.053	0.058	0.041	0.046	0.045	0.057	0.033	0.053	0.035		0.083	0.087	0.093	0.086	0.081	0.091	0.083	0.079	0.089	0.081	0.087	0.086		0.076	0.091	0.092	0.096	0.093	0.084	0.073	0.086
	wo	0.370	0.364	0.351	0.360	0.390	0.368	0.357	0.349	0.330	0.398	0.309	0.387	0.376		0.401	0.390	0.346	0.387	0.393	0.394	0.389	0.398	0.400	0.392	0.393	0.402		0.332	0.327	0.328	0.347	0.317	0.333	0.323	0.337	0.333	0.327	0.343	0.323		0.326	0.347	0.446	0.343	0.338	0.366	0.324	0.342
[truncated: 24 more columns]
